# Supplementary material
Source: publisher site journal article supplement (https://www.dovepress.com/article/399603)
Supplement: Supplementary file 1 [file get_supplementary_file.php]

**Annex I: Data collection tool/questioner**

Socio-demographic characteristics

| Ser. Number | Question | Response | Code |
| --- | --- | --- | --- |
| 101 | age(yrs.) | ______ |  |
| 102 | Sex | ______ |  |
| 103 | Residency | _____ |  |

Data on pattern of admission

| Ser. Number | Question | Response | Code |
| --- | --- | --- | --- |
| 201 | Cause of injury | 1. RTA 2. Fall 3. Assault 4. Pedestrian 5. Specifiy _____________ |  |
| 202 | Mechanism of injury | 1. Blunt 2. Penetrating |  |
| 203 | Time arrival from trauma to hospital after injury | 1. ≤ 24 hour  2. > 24 hour |  |
| 204 | Pre hospital management | 1. Yes 2. No |  |
| 205 | Concomitant injury | 1. Yes 2. no   If yes; site of injury_____________ |  |
| 206 | CT scan done | 1. Yes 2. No   If yes= diagnosis   1. EDH 2. Contusion 3. SDH 4. Skull fracture 5. Intracerebral hemorrhage 6. Other specify ______________ |  |

Data on conditions of the admission to hospital

| Ser. Number | Questions | Response | Code |
| --- | --- | --- | --- |
| 301 | GCS | 1. 3-8 2. 9-12 3. 13-15 |  |
| 302 | HR | 1. <60 2. 60-89 3. 90-99 4. ≥100 |  |
| 303 | Respiratory rate | 1. < 10 2. 10-20 3. >20 |  |
| 304 | Systolic blood pressure | 1. <90 2. 90-99 3. 100-149 4. >=150 |  |
| 305 | Oxygen saturation(SPO2) | 1. ≥95 2. 90-94 3. <90 |  |
| 306 | Pupillary response | 1. Normal 2. Abnormal   If abnormal= 1. One eye  2. Two eye |  |

Condition and management in the perioperative period and during hospitalization

| Ser. Number | Questions | Response | Code |
| --- | --- | --- | --- |
| 401 | Surgery done | 1. Yes 2. no |  |
| 402 | Type of Procedure | __________________ |  |
| 403 | Intraoperative hypoxia episode | 1. Yes 2. No |  |
| 404 | Intra-operative hypotension episode | 1. Yes 2. No |  |
| 405 | Post-operative complication | 1. Yes 2. No |  |
| 406 | Estimated Blood loos in ml | 1. < 1000 2. > 1000 |  |
| 407 | Blood transfusion in unit | ____________ |  |
| 408 | ICU admission | 1. Yes 2. No |  |  |
| 409 | Mechanically ventilated | 1. Yes 2. No |  |
| 410 | Hypotension episode during hospitalization | 1. Yes 2. No |  |
| 411 | Hypoxia episode during hospitalization | 1. Yes 2. No |  |
| 412 | Blood glucose level during hospital stay analyzed | If yes. Max=  Min= |  |
| 413 | Electrolyte disturbance | 1. Yes 2. No |  |
| 414 | Hyperthermia | 1.yes  2. No |  |

Mortality following Traumatic brain injury after hospitalization

| Ser. Number | Question | Response | Code |
| --- | --- | --- | --- |
| 501 | Mortality | 1. Not died 2. Died |  |
| 502 | Length of hospital stay in days | ___________ |  |
